# Supplementary material
Source: PubMed Central journal article supplement (PMC151407)
Supplement: pnas_0437841100_1.pdf [file pnas_0437841100_1.pdf]

**Table 2. Name and sequences of siRNAs for influenza virus**

| siRNA specificity | Sequences<br>(top strand, 5' to 3')                  |
|-------------------|------------------------------------------------------|
| PB2-2210          | GGAGACGUGGUGUUGGUAAdTdT<br>dTdTCCUCUGCACCACAACCAUU   |
| PB2-2240          | CGGGACUCUAGCAUACUAdTdT<br>dTdTGCCUGAGAUCGUAUGAAU     |
| PB1-6             | GCAGGCAAACCAUUUGAAUdTdT<br>dTdTTCGUCCGUUUGGUAACUUA   |
| PB1-129           | CAGGAUACACCAUGGAUACdTdT<br>dTdTGUCCUAUGUGGUACCUAUG   |
| PB1-2257          | GAUCUGUCCACCAUUGAAAdTdT<br>dTdTTCUAGACAAGGUGGUAACUU  |
| PA-44             | UGCUUCAAUCCGAUGAUUGdTdT<br>dTdTACGAAGUUAGGCUACUAAAC  |
| PA-739            | CGGCUACAUUGAGGGCAAGdTdT<br>dTdTTGCCGAUGUAAACUCCCGUUC |
| PA-2087           | GCAAUUGAGGAGUGCCUGAdTdT<br>dTdTTCGUUAAACUCCUCACGGACU |
| PA-2110           | UGAUCCCUGGGUUUUGCUUdTdT<br>dTdTACUAGGGACCCAAAACGAA   |
| PA-2131           | UGCUUCUUGGUUCAACUCCdTdT<br>dTdTACGAAGAACCAAGUUGAGG   |
| NP-231            | UAGAGAGAAUGGUGCUCUCdTdT<br>dTdTUAUCUCUCUUACCACGAGAG  |
| NP-390            | UAAGGCGAAUCUGGCGCCAdTdT<br>dTdTTAUUCGCUUAGACCGCGGU   |
| NP-1496           | GGAUCUUAUUUCUUCGGAGdTdT<br>dTdTCCUAGAAUAAAGAAGCCUC   |
| M-37              | CCGAGGUCGAAACGUACGUdTdT<br>dTdTGGCUC CAGCUUUGCAUGCA  |
| M-480             | CAGAUUGCUGACUCCAGCdTdT<br>dTdTGUCUAACGACUGAGGGUCG    |
| M-598             | UGGCUGGAUCGAGUGAGCAdTdT<br>dTdTACCGACCUAGCUCACUCGU   |
| M-934             | GAAUAUCGAAAGGAACAGCdTdT<br>dTdTTCUUAUAGCUUCCUUGUCG   |
| NS-128            | CGGCUUCGCCGAGAUCAGAdAdT<br>dTdTAGCCGAAGCGGCUCUAGUCU  |
| NS-562            | GUCCUCCGAUGAGGACUCCdTdT<br>dTdTTCAGGAGGCUACUCCUGAGG  |
| NS-589            | UGAUAACACAGUUCGAGUCdTdT<br>dTdTACUAUUGUGUCAAGCUCAG   |
| GFP-949           | GGCUACGUCCAGGAGCGCAUU<br>UCCGAUGCAGGUCCUCGCGU        |

The name of each siRNA indicates its specificity and the location of the sequence in

the original gene. For example, NP-1496 indicates an siRNA specific for NP, with the first nucleotide at position 1496 of the NP gene.
