# Supplementary material
Source: PubMed Central journal article supplement (PMC151407)
Supplement: pnas_0437841100_2.pdf [file pnas_0437841100_2.pdf]

**Table 3. Sequences of primers for reverse transcription (RT) and real-time PCR**

Primers for RT

| Primer specificity | Sequences (5' to 3')                 |
|--------------------|--------------------------------------|
| mRNA               | TTTTTTTTTTTTTTTTTT                   |
| NP vRNA            | CTCGTCGCTTATGACAAAGAAG               |
| NP cRNA            | ATATCGTCTCGTATTAGTAGAAACAAGGGTATTTT  |
| NS vRNA            | CAGGACATACTGATGAGGATG                |
| NS cRNA            | AATATCGTCTCGTATTAGTAGAAACAAGGGTGTTTT |
| M vRNA             | CGCTCAGACATGAGAACAGAATGG             |
| M cRNA             | ATATCGTCTCGTATTAGTAGAAACAAGGTAGTTTT  |
| PA vRNA            | GCTTCTTATCGTTCAGGCTCTTAGG            |
| PA cRNA            | ATATCGTCTCGTATTAGTAGAAACAAGGTACTT    |
| PB1 vRNA           | GTGCAGAAATCAGCCCGAATGGTTC            |
| PB1 cRNA           | ATATCGTCTCGTATTAGTAGAAACAAGGCATTT    |

Primers for real-time PCR

| Primer specificity | Sequences (5' to 3')                                    |
|--------------------|---------------------------------------------------------|
| NP                 | CTCGTCGCTTATGACAAAGAAG<br>AGATCATCATGTGAGTCAGAC         |
| NS                 | CAGGACATACTGATGAGGATG<br>GTTTCAGAGACTCGAACTGTG          |
| M                  | CGCTCAGACATGAGAACAGAATGG<br>TAACTAGCCTGACTAGCAACCTC     |
| PA                 | GCTTCTTATCGTTCAGGCTCTTAGG<br>CCGAGAAGCATTAAAGCAAACCCAG  |
| PB1                | CGGATTGATGCACGGATTGATTTC<br>GACGTCTGAGCTCTTCAATGGTGGAAC |
| $\gamma$ -Actin    | TCTGTCAGGGTTGGAAAGTC<br>AAATGCAAACCGCTTCCAAC            |
| GFP                | CGACAACCACTACCTGAGCAC<br>CCAGAAGCGGCCGCGTCTGACTTACTTGA  |
